# Supplementary material
Source: PubMed Central journal article supplement (PMC11115025)
Supplement: 18_2012_1033_MOESM1_ESM.pdf [file 18_2012_1033_MOESM1_ESM.pdf]

## **Electronic Supplementary Material**

*Cellular and Molecular Life Sciences*

### **Key role of integrin $\alpha_{IIb}\beta_3$ signaling to Syk kinase in tissue factor-induced thrombin generation**

Paola E.J. van der Meijden<sup>1</sup>, Marion A.H. Feijge<sup>1\*</sup>, Frauke Swieringa<sup>1\*</sup>, Karen Gilio<sup>1</sup>,  
Reyhan Nergiz-Unal<sup>1</sup>, Karly Hamulyák<sup>2</sup> and Johan W.M. Heemskerk<sup>1\*\*</sup>

<sup>1</sup>Department of Biochemistry, Cardiovascular Research Institute Maastricht (CARIM);

<sup>2</sup>Haemostasis Laboratory, Department of Internal Medicine, Maastricht University Medical Centre, Maastricht, The Netherlands.

\*M.A.H.F. and F.S. contributed equally

\*\*Corresponding author: Johan W. M. Heemskerk PhD, Dep. Biochemistry (CARIM), Maastricht University, PO Box 616, 6200 MD Maastricht, The Netherlands.

Tel: +31-43-3881671, fax: +31-43-3884159; e-mail:

[jwm.heemskerk@maastrichtuniversity.nl](mailto:jwm.heemskerk@maastrichtuniversity.nl)

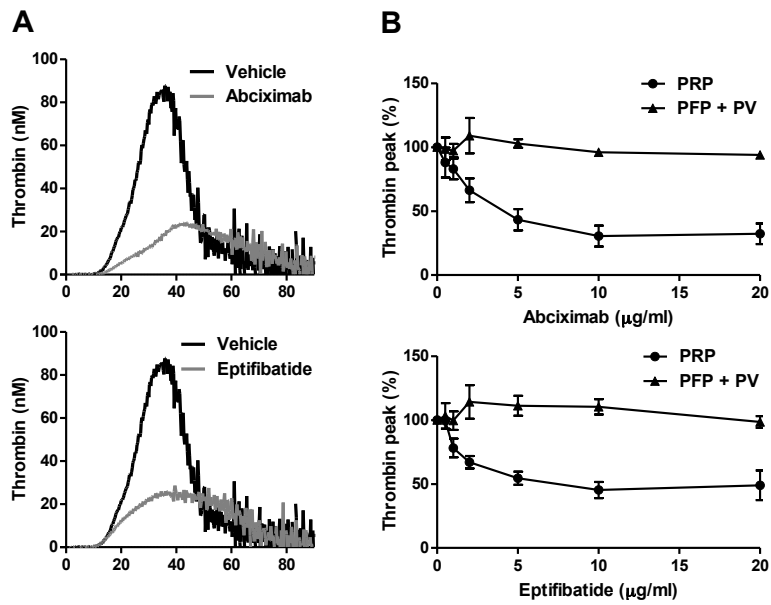

**Fig. 1** Blocking of  $\alpha_{IIb}\beta_3$  suppresses tissue factor-triggered thrombin generation in the presence of platelets. Human PRP ( $1.0 \times 10^8$  platelets/mL) or PFP supplemented with phospholipid vesicles (PV, 10  $\mu$ M) was preincubated with vehicle, abciximab (0.5-20  $\mu$ g/mL) or eptifibatide (0.5-20  $\mu$ g/mL) for 20 minutes. Thrombin generation was stimulated with tissue factor (1 pM) and  $\text{CaCl}_2$ . **a** Representative thrombin generation curves with PRP, showing comparable effects of all integrin blockers. **b** Dose-dependent inhibition of thrombin generation only in the presence of platelets. Means  $\pm$  SEM ( $n=3-9$ )

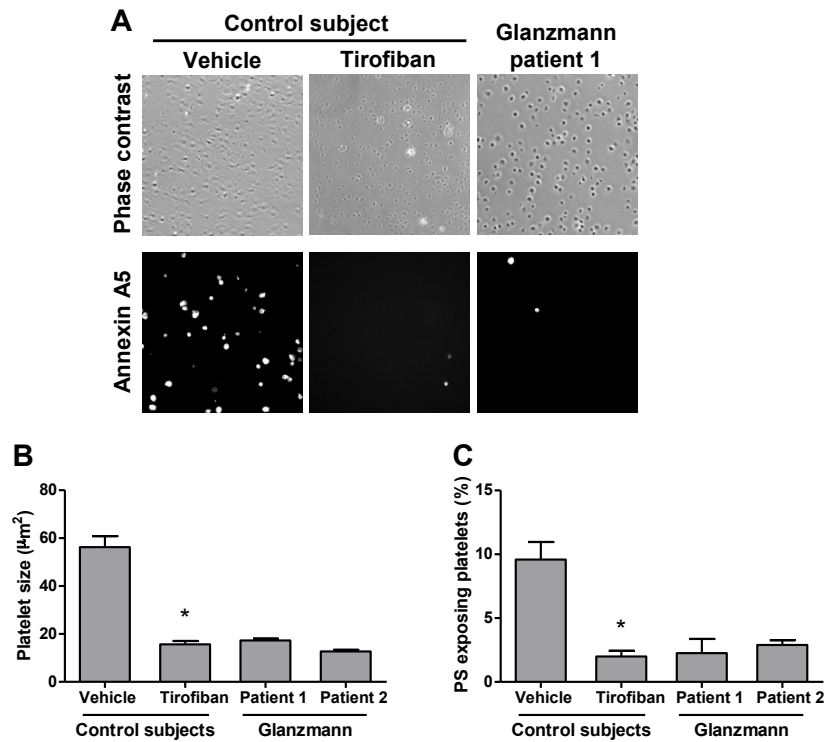

**Fig. 2** Impaired spreading and thrombin activation of Glanzmann platelets. Platelets from healthy control subjects and Glanzmann patients were adhered to fibrinogen in the absence (control) or presence of tirofiban (1  $\mu\text{g}/\text{mL}$ ) for 30 minutes, and then stimulated with thrombin (10 nM) for another 10 minutes. **a** Representative phase contrast (120 $\times$ 120  $\mu\text{m}$ ) and FITC-annexin A5 fluorescence (150 $\times$ 150  $\mu\text{m}$ ) images after thrombin activation. **b** Averaged platelet size; **c** fractions of PS-exposing platelets after activation. Means  $\pm$  SEM ( $n=3-6$ ); \* $p<0.05$  vs. vehicle

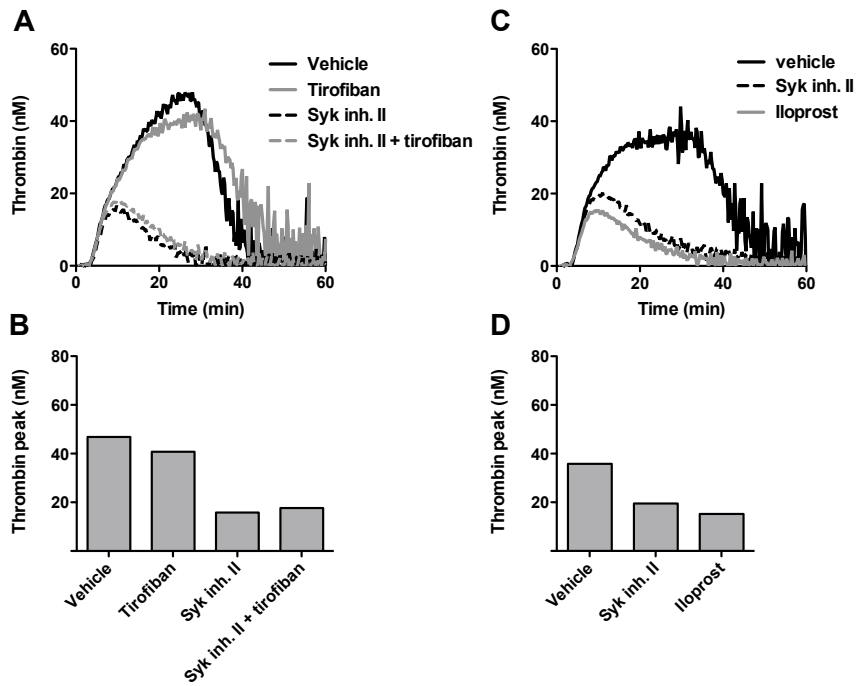

**Fig. 3** Syk kinase is responsible for thrombin generation in tissue factor-stimulated PRP of a Glanzmann patient. PRP was incubated with vehicle, Syk inhibitor II (10  $\mu$ M), iloprost (1  $\mu$ M) and/or tirofiban (1  $\mu$ g/mL), and then stimulated with tissue factor (1 pM) and  $\text{CaCl}_2$ . Cangrelor (AR-C, 10  $\mu$ M) was present to eliminate  $\text{P2Y}_{12}$ -dependent signaling events. **a, b** Effect of inhibitors on tissue factor-induced thrombin generation in PRP from blood samples collected on citrate, and **c, d** on citrate and tirofiban (1  $\mu$ g/mL). Representative thrombin generation curves and mean thrombin peak heights of triplicate measurements are shown.
